# Supplementary material for: Global total ozone recovery trends attributed to ozone-depleting substance (ODS) changes derived from five merged ozone datasets
Source: Copernicus journal article supplement (doi:10.5194/acp-22-6843-2022), 2022-05-25
Supplement: Supplementary file 1 [file acp-22-6843-2022-supplement.pdf]

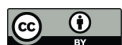

*Supplement of*

## **Global total ozone recovery trends attributed to ozone-depleting substance (ODS) changes derived from five merged ozone datasets**

**Mark Weber et al.**

*Correspondence to:* Mark Weber ([weber@uni-bremen.de](mailto:weber@uni-bremen.de))

The copyright of individual parts of the supplement might differ from the article licence.

**Table S1.** Different MLR settings applied to the broad zonal mean median ozone timeseries but limited to the period 1979-2016 (last four years removed compared to Table 3). For explanations of terms see Table 3. Standard MLR is based upon Eq. 1 with  $P(t) = 0$ . Iterative MLR means that only terms in  $P(t)$  and the ENSO term are fitted when they are statistically significant ( $2\sigma$ ), while full MLR includes all terms in Eq. 1 and  $P(t)$ .

| zonal bands | MLR       | parameters added | $r^2$ | $\chi$<br>[DU] | trend ( $t \leq 1995$ )<br>[%/decade] | trend ( $t \geq 1996$ )<br>[%/decade] |
|-------------|-----------|------------------|-------|----------------|---------------------------------------|---------------------------------------|
| 60°S-60°N   | full      | all              | 0.95  | 1.0            | <b>-1.6(6)</b>                        | <b>+0.4(3)</b>                        |
|             | iterative | BDCs, BDCn, AAO  | 0.95  | 1.0            | <b>-1.6(6)</b>                        | <b>+0.4(2)</b>                        |
|             | standard  | -                | 0.79  | 1.2            | <b>-2.2(6)</b>                        | <b>+0.3(3)</b>                        |
| 35N°S-60°N  | full      | all              | 0.88  | 3.0            | <b>-2.0(14)</b>                       | +0.5(7)                               |
|             | iterative | all              | 0.88  | 3.0            | <b>-2.0(14)</b>                       | +0.5(7)                               |
|             | standard  | -                | 0.76  | 4.0            | <b>-4.0(15)</b>                       | +0.3(9)                               |
| 20S°S-20°N  | full      | all              | 0.87  | 1.2            | <b>-1.1(8)</b>                        | +0.2(4)                               |
|             | iterative | BDCs, ENSO       | 0.85  | 1.2            | <b>-0.6(6)</b>                        | +0.2(4)                               |
|             | standard  | -                | 0.79  | 1.4            | <b>-0.8(7)</b>                        | +0.2(4)                               |
| 35S°S-60°S  | full      | all              | 0.92  | 2.6            | <b>-2.7(14)</b>                       | <b>+0.6(6)</b>                        |
|             | iterative | AAO              | 0.90  | 2.6            | <b>-3.0(12)</b>                       | <b>+0.6(6)</b>                        |
|             | standard  | -                | 0.79  | 3.6            | <b>-3.2(16)</b>                       | +0.6(7)                               |

bold numbers: statistical significance at  $2\sigma$
